# Supplementary material for: Occurrence and Risk Assessment of Pesticides, Phthalates, and Heavy Metal Residues in Vegetables from Hydroponic and Conventional Cultivation
Source: MDPI journal article supplement (doi:10.3390/foods13081151), 2024-04-10
Supplement: s1 [file s1]

## SUPPORTING MATERIALS

**Table S1.** 120 pesticides in this study

| Pesticide           | Molecular formula                                                                           | Molecular weight | CAS number  |
|---------------------|---------------------------------------------------------------------------------------------|------------------|-------------|
| Abamectin           | C <sub>48</sub> H <sub>72</sub> O <sub>14</sub>                                             | 873.09           | 65195-55 -3 |
| Acephate            | C <sub>4</sub> H <sub>10</sub> NO <sub>3</sub> PS                                           | 183.17           | 30560-19-1  |
| Acetamiprid         | C <sub>10</sub> H <sub>11</sub> ClN <sub>4</sub>                                            | 222.68           | 135410-20-7 |
| Acetochlor          | C <sub>14</sub> H <sub>20</sub> ClNO <sub>2</sub>                                           | 269.8            | 34256-82-1  |
| Acrinathrin         | C <sub>26</sub> H <sub>21</sub> F <sub>6</sub> NO <sub>5</sub>                              | 541.44           | 101007-06-1 |
| Alachlor            | C <sub>14</sub> H <sub>20</sub> ClNO <sub>2</sub>                                           | 269.77           | 15972-60-8  |
| Azoxystrobin        | C <sub>22</sub> H <sub>17</sub> N <sub>3</sub> O <sub>5</sub>                               | 403.39           | 131860-33-8 |
| Bifenthrin          | C <sub>23</sub> H <sub>22</sub> ClF <sub>3</sub> O <sub>2</sub>                             | 422.87           | 82657-04-3  |
| Boscalid            | C <sub>18</sub> H <sub>12</sub> Cl <sub>2</sub> N <sub>2</sub> O                            | 343.21           | 188425-85-6 |
| Bromopropylate      | C <sub>17</sub> H <sub>16</sub> Br <sub>2</sub> O <sub>3</sub>                              | 428.11           | 18181-80-1  |
| Buprofezin          | C <sub>16</sub> H <sub>23</sub> N <sub>3</sub> OS                                           | 305.4            | 69327-76-0  |
| Carbaryl            | C <sub>12</sub> H <sub>11</sub> NO <sub>2</sub>                                             | 201.22           | 63-25-2     |
| Carbendazim         | C <sub>9</sub> H <sub>9</sub> N <sub>3</sub> O <sub>2</sub>                                 | 191.2            | 10605-21-7  |
| Carbofuran          | C <sub>12</sub> H <sub>15</sub> NO <sub>3</sub>                                             | 221.25           | 1563-66-2   |
| Carbophenothion     | C <sub>11</sub> H <sub>16</sub> ClO <sub>2</sub> PS <sub>3</sub>                            | 342.87           | 786-19-6    |
| Carboxin            | C <sub>12</sub> H <sub>13</sub> NO <sub>2</sub> S                                           | 237.29           | 5234-68-4   |
| Chloantraniliprole  | C <sub>18</sub> H <sub>14</sub> BrCl <sub>2</sub> N <sub>5</sub> O <sub>2</sub>             | 483.15           | 500008-45-7 |
| Chlorbenzuron       | C <sub>14</sub> H <sub>10</sub> Cl <sub>2</sub> N <sub>2</sub> O <sub>2</sub>               | 309.14           | 196791-54-5 |
| Chlorfenapyr        | C <sub>15</sub> H <sub>11</sub> BrClF <sub>3</sub> N <sub>2</sub> O                         | 407.62           | 122453-73-0 |
| Chlorfenson         | C <sub>12</sub> H <sub>8</sub> Cl <sub>2</sub> O <sub>3</sub> S                             | 303.16           | 80-33-1     |
| Chlorfluazuron      | C <sub>20</sub> H <sub>9</sub> C <sub>13</sub> F <sub>5</sub> N <sub>3</sub> O <sub>3</sub> | 540.65           | 71422-67-8  |
| Chlormequat         | C <sub>5</sub> H <sub>13</sub> Cl <sub>2</sub> N                                            | 158.07           | 999-81-5    |
| Chlorothalonil      | C <sub>8</sub> Cl <sub>4</sub> N <sub>2</sub>                                               | 265.91           | 1897-45-6   |
| Chlorpyrifos        | C <sub>9</sub> H <sub>11</sub> Cl <sub>3</sub> NO <sub>3</sub> PS                           | 350.59           | 220-864-4   |
| Chlorpyrifos-methyl | C <sub>7</sub> H <sub>7</sub> Cl <sub>3</sub> NO <sub>3</sub> PS                            | 322.53           | 5598-13-0   |
| Chlorthiophos       | C <sub>11</sub> H <sub>15</sub> Cl <sub>2</sub> O <sub>3</sub> PS <sub>2</sub>              | 361.24           | 60238-56-4  |
| Clofentezine        | C <sub>14</sub> H <sub>8</sub> Cl <sub>2</sub> N <sub>4</sub>                               | 303.15           | 74115-24-5  |
| Clothianidin        | C <sub>6</sub> H <sub>8</sub> ClN <sub>5</sub> O <sub>2</sub> S                             | 249.7            | 210880-92-5 |
| Cyflufenamid        | C <sub>20</sub> H <sub>17</sub> F <sub>5</sub> N <sub>2</sub> O <sub>2</sub>                | 412.4            | 180409-60-3 |
| Cyfluthrin          | C <sub>22</sub> H <sub>18</sub> Cl <sub>2</sub> FNO <sub>3</sub>                            | 434.29           | 68359-37-5  |
| Cyhalothrin         | C <sub>23</sub> H <sub>19</sub> ClF <sub>3</sub> NO <sub>3</sub>                            | 449.85           | 91465-08-6  |
| Cymoxanil           | C <sub>7</sub> H <sub>10</sub> N <sub>4</sub> O <sub>3</sub>                                | 198.18           | 57966-95-7  |
| Cypermethrin        | C <sub>22</sub> H <sub>19</sub> Cl <sub>2</sub> NO <sub>3</sub>                             | 416.30           | 52315-07-8  |
| Cyproconazole       | C <sub>15</sub> H <sub>18</sub> ClN <sub>3</sub> O                                          | 291.78           | 94361-06-5  |
| Cyprodinil          | C <sub>14</sub> H <sub>15</sub> N <sub>3</sub>                                              | 225.29           | 121552-61-2 |
| Cyromazine          | C <sub>6</sub> H <sub>10</sub> N <sub>6</sub>                                               | 166.18           | 66215-27-8  |
| Deltamethrin        | C <sub>22</sub> H <sub>19</sub> Br <sub>2</sub> NO <sub>3</sub>                             | 505.2            | 52918-63-5  |
| Diazinon            | C <sub>12</sub> H <sub>21</sub> N <sub>2</sub> O <sub>3</sub> PS                            | 304.35           | 333-41-5    |
| Dichlorvos          | C <sub>4</sub> H <sub>7</sub> Cl <sub>2</sub> O <sub>4</sub> P                              | 220.98           | 62-73-7     |

|                    |                                                                                             |        |             |
|--------------------|---------------------------------------------------------------------------------------------|--------|-------------|
| Dicofol            | C <sub>14</sub> H <sub>9</sub> Cl <sub>5</sub> O                                            | 370.49 | 115-32-2    |
| Diethofencarb      | C <sub>14</sub> H <sub>21</sub> NO <sub>4</sub>                                             | 267.32 | 87130-20-9  |
| Difenoconazole     | C <sub>19</sub> H <sub>17</sub> Cl <sub>2</sub> N <sub>3</sub> O <sub>3</sub>               | 406.27 | 119446-68-3 |
| Diffubenzuron      | C <sub>14</sub> H <sub>9</sub> ClF <sub>2</sub> N <sub>2</sub> O <sub>2</sub>               | 310.68 | 35367-38-5  |
| Dimethoate         | C <sub>5</sub> H <sub>12</sub> NO <sub>3</sub> PS <sub>2</sub>                              | 229.26 | 60-51-5     |
| Dimethomorph       | C <sub>21</sub> H <sub>22</sub> ClNO <sub>4</sub>                                           | 387.86 | 110488-70-5 |
| Emamectin benzoate | C <sub>49</sub> H <sub>77</sub> NO <sub>13</sub>                                            | 888.13 | 155569-91-8 |
| Fenhexamid         | C <sub>14</sub> H <sub>17</sub> Cl <sub>2</sub> NO <sub>2</sub>                             | 302.20 | 126833-17-8 |
| Fenitrothion       | C <sub>9</sub> H <sub>12</sub> NO <sub>5</sub> PS                                           | 277.23 | 122-14-5    |
| Fenobucarb         | C <sub>12</sub> H <sub>17</sub> NO <sub>2</sub>                                             | 207.27 | 3766-81-2   |
| Fenothiocarb       | C <sub>13</sub> H <sub>19</sub> NO <sub>2</sub> S                                           | 253.36 | 62850-32-2  |
| Fenpropathrin      | C <sub>22</sub> H <sub>23</sub> NO <sub>3</sub>                                             | 349.42 | 39515-41-8  |
| Fenthion           | C <sub>10</sub> H <sub>15</sub> O <sub>3</sub> PS <sub>2</sub>                              | 278.20 | 55-38-9     |
| Fenvalerate        | C <sub>25</sub> H <sub>22</sub> ClNO <sub>3</sub>                                           | 419.9  | 51630-58-1  |
| Fipronil           | C <sub>12</sub> H <sub>4</sub> Cl <sub>2</sub> F <sub>6</sub> N <sub>4</sub> OS             | 437.15 | 120068-37-3 |
| Fluazinam          | C <sub>13</sub> H <sub>4</sub> Cl <sub>2</sub> F <sub>6</sub> N <sub>4</sub> O <sub>4</sub> | 465.09 | 79622-59-6  |
| Flucythrinate      | C <sub>26</sub> H <sub>23</sub> F <sub>2</sub> NO <sub>4</sub>                              | 451.47 | 70124-77-5  |
| Flusilazole        | C <sub>16</sub> H <sub>15</sub> F <sub>2</sub> N <sub>3</sub> Si                            | 315.4  | 85509-19-9  |
| Fosthiazate        | C <sub>9</sub> H <sub>18</sub> NO <sub>3</sub> PS <sub>2</sub>                              | 283.35 | 98886-44-3  |
| Hexaconazole       | C <sub>14</sub> H <sub>17</sub> Cl <sub>2</sub> N <sub>3</sub> O                            | 314.21 | 79983-71-4  |
| Imidacloprid       | C <sub>9</sub> H <sub>10</sub> ClN <sub>5</sub> O <sub>2</sub>                              | 255.66 | 138261-41-3 |
| Indoxacarb         | C <sub>22</sub> H <sub>17</sub> ClF <sub>3</sub> N <sub>3</sub> O <sub>7</sub>              | 527.83 | 144171-61-9 |
| Iprodione          | C <sub>13</sub> H <sub>13</sub> Cl <sub>2</sub> N <sub>3</sub> O <sub>3</sub>               | 330.17 | 36734-19-7  |
| Isazofos           | C <sub>9</sub> H <sub>17</sub> ClN <sub>3</sub> O <sub>3</sub> PS                           | 313.74 | 42509-80-8  |
| Isocarbophos       | C <sub>11</sub> H <sub>16</sub> NO <sub>4</sub> PS                                          | 289.29 | 24353-61-5  |
| Isofenphos-methyl  | C <sub>14</sub> H <sub>22</sub> NO <sub>4</sub> PS                                          | 331.37 | 99675-03-3  |
| Isoprocarb         | C <sub>11</sub> H <sub>15</sub> NO <sub>2</sub>                                             | 193.24 | 2631-40-5   |
| Isoxathion         | C <sub>13</sub> H <sub>16</sub> NO <sub>4</sub> PS                                          | 313.31 | 18854-01-8  |
| Kresoxim-methyl    | C <sub>18</sub> H <sub>19</sub> NO <sub>4</sub>                                             | 313.35 | 143390-89-0 |
| Lufenuron          | C <sub>17</sub> H <sub>8</sub> Cl <sub>2</sub> F <sub>8</sub> N <sub>2</sub> O <sub>3</sub> | 511.15 | 103055-07-8 |
| Malaoxon           | C <sub>10</sub> H <sub>19</sub> O <sub>7</sub> PS                                           | 314.29 | 1634-78-2   |
| Malathion          | C <sub>10</sub> H <sub>19</sub> O <sub>6</sub> PS <sub>2</sub>                              | 330.36 | 121-75-5    |
| Mepanipyrim        | C <sub>14</sub> H <sub>13</sub> N <sub>3</sub>                                              | 223.27 | 110235-47-7 |
| Mepiquat chloride  | C <sub>7</sub> H <sub>16</sub> ClN                                                          | 149.66 | 24307-26-4  |
| Metalaxyl          | C <sub>15</sub> H <sub>21</sub> NO <sub>4</sub>                                             | 279.33 | 57837-19-1  |
| Methacrifos        | C <sub>7</sub> H <sub>13</sub> O <sub>5</sub> PS                                            | 240.21 | 62610-77-9  |
| Methamidophos      | C <sub>2</sub> H <sub>8</sub> NO <sub>2</sub> PS                                            | 141.13 | 10265-92-6  |
| Methomyl           | C <sub>5</sub> H <sub>10</sub> N <sub>2</sub> O <sub>2</sub> S                              | 162.21 | 16752-77-5  |
| Monocrotophos      | C <sub>7</sub> H <sub>14</sub> NO <sub>5</sub> P                                            | 223.16 | 6923-22-4   |
| Myclobutanil       | C <sub>15</sub> H <sub>17</sub> ClN <sub>4</sub>                                            | 288.78 | 88671-89-0  |
| Naled              | C <sub>4</sub> H <sub>7</sub> Br <sub>2</sub> Cl <sub>2</sub> O <sub>4</sub> P              | 380.78 | 300-76-5    |
| Napropamide        | C <sub>17</sub> H <sub>21</sub> NO <sub>2</sub>                                             | 271.35 | 15299-99-7  |
| Omethoate          | C <sub>5</sub> H <sub>12</sub> NO <sub>4</sub> PS                                           | 213.19 | 1113-02-6   |

|                    |                                                                               |        |             |
|--------------------|-------------------------------------------------------------------------------|--------|-------------|
| Paclobutrazol      | C <sub>15</sub> H <sub>20</sub> ClN <sub>3</sub> O                            | 293.8  | 76738-62-0  |
| Parathion          | C <sub>10</sub> H <sub>14</sub> NO <sub>5</sub> PS                            | 291.26 | 56-38-2     |
| Parathion-methyl   | C <sub>8</sub> H <sub>10</sub> NO <sub>5</sub> PS                             | 263.21 | 298-00-0    |
| Penconazole        | C <sub>13</sub> H <sub>15</sub> Cl <sub>2</sub> N <sub>3</sub>                | 284.18 | 66246-88-6  |
| Pendimethalin      | C <sub>13</sub> H <sub>19</sub> N <sub>3</sub> O <sub>4</sub>                 | 281.31 | 40487-42-1  |
| Phorate            | C <sub>7</sub> H <sub>17</sub> O <sub>2</sub> PS <sub>3</sub>                 | 260.38 | 298-02-2    |
| Phorate sulfone    | C <sub>7</sub> H <sub>17</sub> O <sub>4</sub> PS <sub>3</sub>                 | 292.38 | 2588-04-7   |
| Phorate sulfoxide  | C <sub>7</sub> H <sub>17</sub> O <sub>3</sub> PS <sub>3</sub>                 | 276.38 | 2588-03-6   |
| Phosalone          | C <sub>12</sub> H <sub>15</sub> ClNO <sub>4</sub> PS <sub>2</sub>             | 367.81 | 2310-17-0   |
| Phosmet            | C <sub>11</sub> H <sub>12</sub> NO <sub>4</sub> PS <sub>2</sub>               | 317.32 | 732-11-6    |
| Phoxim             | C <sub>12</sub> H <sub>15</sub> N <sub>2</sub> O <sub>3</sub> PS              | 298.30 | 14816-18-3  |
| Prochloraz         | C <sub>15</sub> H <sub>16</sub> Cl <sub>3</sub> N <sub>3</sub> O <sub>2</sub> | 376.7  | 67747-09-5  |
| Procymidone        | C <sub>13</sub> H <sub>11</sub> Cl <sub>2</sub> NO <sub>2</sub>               | 284.14 | 32809-16-8  |
| Profenofos         | C <sub>11</sub> H <sub>15</sub> BrClO <sub>3</sub> PS                         | 373.63 | 41198-08-7  |
| Propamocarb        | C <sub>9</sub> H <sub>20</sub> N <sub>2</sub> O <sub>2</sub>                  | 188.27 | 24579-73-5  |
| Propiconazole      | C <sub>15</sub> H <sub>17</sub> C <sub>12</sub> N <sub>3</sub> O <sub>2</sub> | 342.22 | 60207-90-1  |
| Pyraclostrobin     | C <sub>19</sub> H <sub>18</sub> N <sub>3</sub> O <sub>4</sub> Cl              | 387.82 | 175013-18-0 |
| Pyridaben          | C <sub>19</sub> H <sub>25</sub> ClN <sub>2</sub> OS                           | 364.93 | 96489-71-3  |
| Pyrimethanil       | C <sub>12</sub> H <sub>13</sub> N <sub>3</sub>                                | 199.25 | 53112-28-0  |
| Quinalphos         | C <sub>12</sub> H <sub>15</sub> N <sub>2</sub> O <sub>3</sub> PS              | 298.3  | 13593-03-8  |
| Quinoxifen         | C <sub>15</sub> H <sub>8</sub> Cl <sub>2</sub> FNO                            | 308.13 | 124495-18-7 |
| Spirodiclofen      | C <sub>21</sub> H <sub>24</sub> Cl <sub>2</sub> O <sub>4</sub>                | 411.32 | 148477-71-8 |
| Sulprofos          | C <sub>12</sub> H <sub>19</sub> O <sub>2</sub> PS <sub>3</sub>                | 322.45 | 35400-43-2  |
| Tebuconazole       | C <sub>16</sub> H <sub>22</sub> ClN <sub>3</sub> O                            | 307.82 | 107534-96-3 |
| Tebufenozide       | C <sub>22</sub> H <sub>28</sub> N <sub>2</sub> O <sub>2</sub>                 | 352.47 | 112410-23-8 |
| Tecnazene          | C <sub>6</sub> HCl <sub>4</sub> NO <sub>2</sub>                               | 260.89 | 117-18-0    |
| Terbufos           | C <sub>9</sub> H <sub>21</sub> O <sub>2</sub> PS <sub>3</sub>                 | 288.43 | 13071-79-9  |
| Terbufos sulfone   | C <sub>9</sub> H <sub>21</sub> O <sub>4</sub> PS <sub>3</sub>                 | 320.43 | 56070-16-7  |
| Tetramethrin       | C <sub>19</sub> H <sub>25</sub> NO <sub>4</sub>                               | 331.41 | 7696-12-0   |
| Thiamethoxam       | C <sub>8</sub> H <sub>10</sub> ClN <sub>5</sub> O <sub>3</sub> S              | 291.71 | 153719-23-4 |
| Thiobencarb        | C <sub>12</sub> H <sub>16</sub> ClNOS                                         | 257.78 | 28249-77-6  |
| Thiophanate-methyl | C <sub>12</sub> H <sub>14</sub> N <sub>4</sub> O <sub>4</sub> S <sub>2</sub>  | 342.39 | 23564-05-8  |
| Triadimefon        | C <sub>14</sub> H <sub>16</sub> ClN <sub>3</sub> O <sub>2</sub>               | 293.75 | 43121-43-3  |
| Triazophos         | C <sub>12</sub> H <sub>16</sub> N <sub>3</sub> O <sub>3</sub> PS              | 313.31 | 24017-47-8  |
| Tridemorph         | C <sub>19</sub> H <sub>39</sub> NO                                            | 297.52 | 24602-86-6  |
| Uniconazole        | C <sub>15</sub> H <sub>18</sub> ClN <sub>3</sub> O                            | 291.78 | 83657-17-4  |
| Vamidothion        | C <sub>8</sub> H <sub>18</sub> NO <sub>4</sub> PS <sub>2</sub>                | 287.34 | 2275-23-2   |
| Vinclozolin        | C <sub>12</sub> H <sub>9</sub> Cl <sub>2</sub> NO <sub>3</sub>                | 286.11 | 50471-44-8  |

**Table S2.** 18 phthalates in this study

| Phthalate              | Molecular formula                              | Molecular weight | CAS number |
|------------------------|------------------------------------------------|------------------|------------|
| Benzyl butyl phthalate | C <sub>19</sub> H <sub>20</sub> O <sub>4</sub> | 312.36           | 85-68-7    |
| Bis(2-butoxyethyl)     | C <sub>20</sub> H <sub>30</sub> O <sub>6</sub> | 366.45           | 117-83-9   |

|                                  |                                                |        |            |
|----------------------------------|------------------------------------------------|--------|------------|
| phthalate                        |                                                |        |            |
| Bis(2-ethoxyethyl) Phthalate     | C <sub>16</sub> H <sub>22</sub> O <sub>6</sub> | 310.34 | 605-54-9   |
| Bis(2-ethylhexyl) phthalate      | C <sub>24</sub> H <sub>38</sub> O <sub>4</sub> | 390.56 | 117-81-7   |
| Bis(2-methoxyethyl) phthalate    | C <sub>14</sub> H <sub>18</sub> O <sub>6</sub> | 282.29 | 117-82-8   |
| Bis(4-methyl-2-pentyl) phthalate | C <sub>20</sub> H <sub>30</sub> O <sub>4</sub> | 334.45 | 146-50-9   |
| Dibenzyl phthalate               | C <sub>22</sub> H <sub>18</sub> O <sub>4</sub> | 346.38 | 523-31-9   |
| Dibutyl phthalate                | C <sub>16</sub> H <sub>22</sub> O <sub>4</sub> | 278.34 | 84-74-2    |
| Dicyclohexyl phthalate           | C <sub>20</sub> H <sub>26</sub> O <sub>4</sub> | 330.42 | 84-61-7    |
| Diethyl phthalate                | C <sub>12</sub> H <sub>14</sub> O <sub>4</sub> | 222.24 | 84-66-2    |
| Dihexyl phthalate                | C <sub>20</sub> H <sub>30</sub> O <sub>4</sub> | 334.45 | 84-75-3    |
| Diisobutyl phthalate             | C <sub>16</sub> H <sub>22</sub> O <sub>4</sub> | 278.34 | 84-69-5    |
| Diisodecyl phthalate             | C <sub>28</sub> H <sub>46</sub> O <sub>4</sub> | 446.66 | 26761-40-0 |
| Diisononyl phthalate             | C <sub>26</sub> H <sub>42</sub> O <sub>4</sub> | 418.61 | 28553-12-0 |
| Dimethyl phthalate               | C <sub>10</sub> H <sub>10</sub> O <sub>4</sub> | 194.18 | 131-11-3   |
| Dinooctyl phthalate              | C <sub>24</sub> H <sub>38</sub> O <sub>4</sub> | 390.56 | 117-84-0   |
| Dinonyl phthalate                | C <sub>26</sub> H <sub>42</sub> O <sub>4</sub> | 418.61 | 84-76-4    |
| Dipentyl phthalate               | C <sub>18</sub> H <sub>26</sub> O <sub>4</sub> | 306.4  | 131-18-0   |

**Table S3.** Retention time (RT) and MRM condition of pesticides for UPLC-MS/MS analysis.

| Analyte        | tr <sup>a</sup><br>(min) | Precursor<br>ion (m/z) | Product<br>ion (m/z) | DP <sup>b</sup><br>(V) | CE <sup>c</sup><br>(eV) |
|----------------|--------------------------|------------------------|----------------------|------------------------|-------------------------|
| Abamectin 1    | 23.44                    | 895.5                  | 751.4                | 195                    | 57                      |
| Abamectin 2    | 23.44                    | 895.5                  | 449.2                | 195                    | 64                      |
| Acephate1      | 2.1                      | 184                    | 143                  | 50                     | 10                      |
| Acephate2      | 2.1                      | 184                    | 125                  | 50                     | 26                      |
| Acetamiprid 1  | 3.7                      | 223                    | 126                  | 70                     | 27                      |
| Acetamiprid 2  | 3.7                      | 223                    | 99                   | 70                     | 47                      |
| Acetochlor 1   | 7.9                      | 270.2                  | 148.2                | 36                     | 15                      |
| Acetochlor 2   | 7.9                      | 270.2                  | 133.1                | 36                     | 45                      |
| Alachlor 1     | 7.9                      | 270.1                  | 238.1                | 46                     | 15                      |
| Alachlor 2     | 7.9                      | 270.1                  | 162                  | 46                     | 25                      |
| Azoxystrobin 1 | 6.7                      | 404.1                  | 372                  | 70                     | 20                      |
| Azoxystrobin 2 | 6.7                      | 404.1                  | 344.1                | 70                     | 34                      |
| Buprofezin 1   | 9.5                      | 306.2                  | 201.1                | 66                     | 17                      |
| Buprofezin 2   | 9.5                      | 306.2                  | 116.2                | 66                     | 21                      |
| Carbaryl 1     | 5.3                      | 202.1                  | 145                  | 54                     | 15                      |
| Carbaryl 2     | 5.3                      | 202.1                  | 127                  | 54                     | 40                      |
| Carbendazim 1  | 4.1                      | 192                    | 160                  | 80                     | 25                      |

|                       |       |       |       |     |     |
|-----------------------|-------|-------|-------|-----|-----|
| Carbendazim 2         | 4.1   | 192   | 132   | 80  | 41  |
| Carbofuran 1          | 5.0   | 222.1 | 165   | 70  | 17  |
| Carbofuran 2          | 5.0   | 222.1 | 123.1 | 70  | 29  |
| Carboxin 1            | 5.4   | 236.1 | 142.9 | 70  | 21  |
| Carboxin 2            | 5.4   | 236.1 | 87    | 70  | 33  |
| Chlorantraniliprole 1 | 6.5   | 483.9 | 452.9 | 80  | 28  |
| Chlorantraniliprole 2 | 6.5   | 483.9 | 285.9 | 80  | 28  |
| Chlorbenzuron 1       | 8.3   | 309   | 156   | 75  | 20  |
| Chlorbenzuron 2       | 8.3   | 309   | 139   | 75  | 44  |
| Chlorfluazuron 1      | 10.4  | 540   | 383   | 110 | 30  |
| Chlorfluazuron 2      | 10.4  | 540   | 158   | 110 | 27  |
| Chlormequat 1         | 1.5   | 121.9 | 57.7  | 38  | 20  |
| Chlormequat 2         | 1.5   | 121.9 | 62.4  | 38  | 20  |
| Chlorpyrifos 1        | 10.0  | 350   | 198   | 82  | 29  |
| Chlorpyrifos 2        | 10.0  | 350   | 97    | 82  | 49  |
| Chlorpyrifos-methyl 1 | 9.0   | 324   | 125.1 | 65  | 28  |
| Chlorpyrifos-methyl 2 | 9.0   | 321.9 | 125.1 | 65  | 25  |
| Clofentezine 1        | 17.87 | 303.0 | 138.0 | 51  | 21  |
| Clofentezine 2        | 17.87 | 303.0 | 102.0 | 51  | 47  |
| Clothianidin 1        | 3.5   | 250   | 169.1 | 71  | 17  |
| Clothianidin 2        | 3.5   | 250   | 132   | 71  | 21  |
| Cymoxanil 1           | 8.56  | 199.1 | 128.1 | 45  | 12  |
| Cymoxanil 2           | 8.56  | 199.1 | 111.1 | 45  | 25  |
| Cyromazine 1          | 1.01  | 167.5 | 125.0 | 60  | 24  |
| Cyromazine 2          | 1.01  | 167.5 | 85.0  | 60  | 24  |
| Deltamethrin 1        | 10.5  | 523.2 | 281   | 55  | 23  |
| Deltamethrin 2        | 10.5  | 523.2 | 506.1 | 55  | 16  |
| Diazinon 1            | 8.6   | 305   | 169   | 80  | 27  |
| Diazinon 2            | 8.6   | 305   | 153   | 80  | 28  |
| Dichlorvos 1          | 4.9   | 221   | 109   | 70  | 23  |
| Dichlorvos 2          | 4.9   | 221   | 127   | 70  | 25  |
| Diethofencarb 1       | 6.9   | 268.1 | 226.1 | 66  | 14  |
| Diethofencarb 2       | 6.9   | 268.1 | 180   | 66  | 25  |
| Difenoconazole 1      | 8.9   | 406.1 | 251   | 120 | 37  |
| Difenoconazole 2      | 8.9   | 406.1 | 337   | 120 | 23  |
| Diiflubenzuron 1      | 8.0   | 311   | 158   | 72  | 21  |
| Diiflubenzuron 2      | 8.0   | 311   | 141.2 | 72  | 47  |
| Dimethoate 1          | 3.7   | 230   | 125   | 56  | 29  |
| Dimethoate 2          | 3.7   | 230   | 199   | 56  | 13  |
| Dimethomorph 1        | 7.1   | 388.1 | 301   | 115 | 29  |
| Dimethomorph 2        | 7.1   | 388.1 | 165   | 115 | 43  |
| Emamectin benzoate 1  | 21.62 | 886.5 | 82.1  | 50  | 110 |
| Emamectin benzoate 2  | 21.62 | 886.5 | 158.1 | 50  | 41  |

|                   |       |       |       |     |     |
|-------------------|-------|-------|-------|-----|-----|
| Fenobucarb 1      | 6.8   | 208.1 | 95    | 65  | 21  |
| Fenobucarb 2      | 6.8   | 208.1 | 152   | 65  | 13  |
| Fenothiocarb 1    | 8.2   | 254.1 | 72.1  | 61  | 35  |
| Fenothiocarb 2    | 8.2   | 254.1 | 160.2 | 61  | 14  |
| Fenthion 1        | 8.4   | 279.1 | 169   | 78  | 23  |
| Fenthion 2        | 8.4   | 279.1 | 247   | 78  | 18  |
| Fipronil 1        | 8.1   | 454   | 368.1 | 50  | 33  |
| Fipronil 2        | 8.1   | 454   | 290.1 | 50  | 42  |
| Fluazinam 1       | 21.55 | 462.9 | 415.9 | -20 | -31 |
| Fluazinam 2       | 21.55 | 462.9 | 398.0 | -20 | -23 |
| Flusilazole 1     | 15.14 | 316.1 | 247.1 | 50  | 26  |
| Flusilazole 2     | 15.14 | 316.1 | 165.1 | 50  | 37  |
| Fosthiazate 1     | 5.7   | 284   | 104   | 63  | 28  |
| Fosthiazate 2     | 5.7   | 284   | 228   | 63  | 15  |
| Hexaconazole 1    | 8.6   | 314.1 | 70.1  | 94  | 45  |
| Hexaconazole 2    | 8.6   | 314.1 | 159   | 94  | 40  |
| Imidacloprid 1    | 3.4   | 256.1 | 175   | 60  | 26  |
| Imidacloprid 2    | 3.4   | 256.1 | 209   | 60  | 23  |
| Indoxacarb 1      | 9.0   | 528.1 | 203   | 71  | 51  |
| Indoxacarb 2      | 9.0   | 528.1 | 56    | 71  | 55  |
| Iprodione 1       | 8.0   | 330.1 | 245   | 85  | 21  |
| Iprodione 2       | 8.0   | 330.1 | 288   | 85  | 16  |
| Isazofos 1        | 7.5   | 314   | 162   | 70  | 22  |
| Isazofos 2        | 7.5   | 314   | 120   | 70  | 40  |
| Isoxathion 1      | 8.7   | 314.1 | 105   | 59  | 21  |
| Isoxathion 2      | 8.7   | 314.1 | 170   | 59  | 19  |
| Lufenuron 1       | 16.94 | 508.9 | 489   | 37  | 11  |
| Lufenuron 2       | 16.94 | 508.9 | 338.9 | 37  | 14  |
| Malathion 1       | 7.3   | 331   | 127   | 64  | 17  |
| Malathion 2       | 7.3   | 331   | 99    | 64  | 31  |
| Mepiquat chloride | 1.6   | 113.9 | 97.8  | 38  | 20  |
| Metalaxyl 1       | 6.2   | 280.2 | 220   | 65  | 18  |
| Metalaxyl 2       | 6.2   | 280.2 | 192.3 | 65  | 24  |
| Methamidophos 1   | 1.7   | 142   | 125   | 54  | 18  |
| Methamidophos 2   | 1.7   | 142   | 94    | 54  | 19  |
| Methomyl 1        | 2.9   | 163   | 106   | 38  | 13  |
| Methomyl 2        | 2.9   | 163   | 88    | 38  | 13  |
| Monocrotophos 1   | 3.1   | 224.1 | 127   | 71  | 21  |
| Monocrotophos 2   | 3.1   | 224.1 | 98    | 71  | 17  |
| Myclobutanil 1    | 7.4   | 289.1 | 70    | 80  | 35  |
| Myclobutanil 2    | 7.4   | 289.1 | 125   | 80  | 46  |
| Napropamide 1     | 7.9   | 272   | 129.3 | 80  | 21  |
| Napropamide 2     | 7.9   | 272   | 171   | 80  | 26  |

|                     |       |       |       |    |    |
|---------------------|-------|-------|-------|----|----|
| Omethoate 1         | 2.3   | 214   | 109   | 56 | 36 |
| Omethoate 2         | 2.3   | 214   | 182.9 | 56 | 16 |
| Paclobutrazol 1     | 7.2   | 294   | 70    | 90 | 50 |
| Paclobutrazol 2     | 7.2   | 294   | 125   | 90 | 55 |
| Parathion 1         | 8.2   | 292   | 236   | 80 | 20 |
| Parathion 2         | 8.2   | 292   | 264   | 80 | 15 |
| Penconazole 1       | 8.3   | 284   | 159   | 81 | 39 |
| Penconazole 2       | 8.3   | 284   | 70    | 81 | 29 |
| Pendimethalin 1     | 10.1  | 282.1 | 212   | 45 | 15 |
| Pendimethalin 2     | 10.1  | 282.1 | 194   | 45 | 25 |
| Phorate 1           | 8.8   | 261   | 75    | 51 | 21 |
| Phorate 2           | 8.8   | 261   | 199   | 51 | 10 |
| Phorate sulfone 1   | 5.9   | 293   | 96.9  | 65 | 50 |
| Phorate sulfone 2   | 5.9   | 293   | 114.7 | 65 | 35 |
| Phorate sulfoxide 1 | 5.7   | 276.9 | 96.9  | 60 | 45 |
| Phorate sulfoxide 2 | 5.7   | 276.9 | 114.7 | 55 | 28 |
| Phosalone 1         | 8.8   | 368   | 182   | 71 | 20 |
| Phosalone 2         | 8.8   | 368   | 322   | 71 | 13 |
| Phosmet 1           | 6.6   | 318   | 160   | 61 | 17 |
| Phosmet 2           | 6.6   | 318   | 133   | 61 | 49 |
| Phoxim 1            | 8.7   | 299.1 | 129   | 67 | 16 |
| Phoxim 2            | 8.7   | 299.1 | 77    | 67 | 46 |
| Prochloraz 1        | 8.8   | 376.2 | 308   | 65 | 17 |
| Prochloraz 2        | 8.8   | 376.2 | 70.1  | 65 | 43 |
| Profenofos 1        | 9.5   | 373   | 302.9 | 80 | 25 |
| Profenofos 2        | 9.5   | 373   | 345.2 | 80 | 18 |
| Propamocarb 1       | 1.06  | 189   | 102   | 80 | 15 |
| Propamocarb 2       | 1.06  | 189   | 74    | 80 | 20 |
| Propiconazole 1     | 8.5   | 342.1 | 159   | 86 | 43 |
| Propiconazole 2     | 8.5   | 342.1 | 69.1  | 86 | 33 |
| Pyraclostrobin 1    | 18.23 | 388.1 | 194.1 | 50 | 18 |
| Pyraclostrobin 2    | 18.23 | 388.1 | 163.1 | 50 | 36 |
| Pyrimethanil 1      | 7.0   | 200   | 107   | 91 | 34 |
| Pyrimethanil 2      | 7.0   | 200   | 82    | 91 | 37 |
| Quinalphos 1        | 8.3   | 299   | 163   | 66 | 31 |
| Quinalphos 2        | 8.3   | 299   | 147   | 66 | 29 |
| Quinoxifen 1        | 10.0  | 308   | 162   | 61 | 57 |
| Quinoxifen 2        | 10.0  | 308   | 197   | 61 | 43 |
| Spirodiclofen 1     | 10.6  | 411.2 | 71.1  | 46 | 25 |
| Spirodiclofen 2     | 10.6  | 411.2 | 313.1 | 46 | 17 |
| Sulprofos 1         | 10.1  | 323   | 219   | 81 | 21 |
| Sulprofos 2         | 10.1  | 323   | 247   | 81 | 17 |
| Tebuconazole 1      | 8.4   | 308.1 | 70    | 90 | 49 |

|                      |       |       |       |    |    |
|----------------------|-------|-------|-------|----|----|
| Tebuconazole 2       | 8.4   | 308.1 | 125   | 90 | 47 |
| Tebuconazole 1       | 15.88 | 353.2 | 133.1 | 35 | 24 |
| Tebuconazole 2       | 15.88 | 353.2 | 297.2 | 35 | 11 |
| Thiamethoxam 1       | 3.0   | 292   | 211   | 60 | 18 |
| Thiamethoxam 2       | 3.0   | 292   | 181   | 60 | 32 |
| Thiobencarb 1        | 8.9   | 258.1 | 125   | 66 | 25 |
| Thiobencarb 2        | 8.9   | 258.1 | 89    | 66 | 67 |
| Thiophanate-methyl 1 | 5.62  | 343.1 | 151.0 | 60 | 26 |
| Thiophanate-methyl 2 | 5.62  | 343.1 | 311.0 | 60 | 15 |
| Triadimefon 1        | 7.4   | 294   | 197   | 81 | 21 |
| Triadimefon 2        | 7.4   | 294   | 225   | 81 | 17 |
| Triazophos 1         | 7.5   | 314   | 119.1 | 70 | 47 |
| Triazophos 2         | 7.5   | 314   | 162   | 70 | 25 |
| Tridemorph 1         | 17.6  | 298   | 130   | 50 | 25 |
| Tridemorph 2         | 17.6  | 298   | 98    | 50 | 30 |
| Uniconazole 1        | 8.0   | 292.1 | 124.9 | 90 | 40 |
| Uniconazole 2        | 8.0   | 292.1 | 70    | 90 | 55 |
| Vamidothion 1        | 3.7   | 288   | 146   | 56 | 17 |
| Vamidothion 2        | 3.7   | 288   | 118   | 56 | 31 |

<sup>a</sup> Retention time; <sup>b</sup> Declustering potential; <sup>c</sup> Collision energy.

**Table S4.** Retention times and MRM parameters of pesticides for GC-MS/MS.

| Pesticides      | t <sub>R</sub> (min) | MRM1              | CE1 (ev) | MRM2              | CE2 (ev) |
|-----------------|----------------------|-------------------|----------|-------------------|----------|
| Acrinathrin     | 31.86                | 288.9 -><br>92.8  | 10       | 207.8 -><br>181.1 | 10       |
| Bifenthrin      | 29.79                | 181.2 -><br>165.2 | 25       | 181.2 -><br>166.2 | 10       |
| Boscalid        | 34.77                | 140.0 -><br>112.0 | 10       | 140.0 -><br>76.0  | 25       |
| Bromopropylate  | 30.50                | 185.0 -><br>157.0 | 15       | 183.0 -><br>155.0 | 15       |
| Carbophenothion | 29.01                | 153.0 -><br>96.9  | 10       | 199.0 -><br>143.0 | 10       |
| Chlorfenapyr    | 25.89                | 408 -> 59         | 15       | 247 -> 227        | 15       |
| Chlorfenson     | 27.32                | 175.0 -><br>111.0 | 10       | 111.0 -><br>75.0  | 15       |
| Chlorothalonil  | 21.43                | 263.8 > 168       | 25       | 263.8 > 229       | 20       |
| Chlorthiophos-1 | 27.80                | 324.8 -><br>268.9 | 10       | 296.8 -><br>268.9 | 5        |
| Chlorthiophos-2 | 28.27                | 324.8 -><br>268.9 | 10       | 296.8 -><br>268.9 | 5        |
| Cyflufenamid    | 27.67                | 118.1 -><br>90.0  | 10       | 118.1 -><br>89.0  | 25       |



|                      |       |                   |    |                   |    |
|----------------------|-------|-------------------|----|-------------------|----|
| Cypermethrin-1       | 33.85 | 163.0 -><br>91.0  | 10 | 163.0 -><br>127.0 | 5  |
| Cypermethrin-2       | 34.13 | 163.0 -><br>91.0  | 10 | 163.0 -><br>127.0 | 5  |
| Cypermethrin-3       | 34.19 | 163.0 -><br>91.0  | 10 | 163.0 -><br>127.0 | 5  |
| Cypermethrin-4       | 34.32 | 163.0 -><br>91.0  | 10 | 163.0 -><br>127.0 | 5  |
| Cyfluthrin-1         | 33.65 | 226.0 -><br>206.0 | 15 | 198.9 -><br>170.1 | 25 |
| Cyfluthrin-2         | 33.89 | 226.0 -><br>206.0 | 15 | 198.9 -><br>170.1 | 25 |
| Cyfluthrin-3         | 33.95 | 226.0 -><br>206.0 | 15 | 198.9 -><br>170.1 | 25 |
| Cyfluthrin-4         | 34.09 | 226.0 -><br>206.0 | 15 | 198.9 -><br>170.1 | 25 |
| lambda-Cyhalothrin-1 | 31.70 | 197.0 -><br>141.0 | 10 | 197.0 -><br>161.0 | 5  |
| lambda-Cyhalothrin-2 | 31.97 | 197.0 -><br>141.0 | 10 | 197.0 -><br>161.0 | 5  |
| Cyproconazole-1      | 29.09 | 139.0 -><br>111.0 | 15 | 222.0 -><br>125.1 | 15 |
| Cyproconazole-2      | 29.10 | 139.0 -><br>111.0 | 15 | 222.0 -><br>125.1 | 15 |
| Cyprodinil           | 23.83 | 225.2 -><br>224.3 | 10 | 224.2 -><br>208.2 | 20 |
| <i>o,p'</i> -Dicofol | 23.29 | 139 > 111         | 15 | 250.9 ><br>138.9  | 15 |
| Fenhexamid           | 26.17 | 177.1 -><br>78.0  | 10 | 97.1 -> 55.1      | 10 |
| Fenitrothion         | 23.67 | 277.0 -><br>260.0 | 5  | 277.0 -><br>109.0 | 20 |
| Fenpropathrin        | 30.75 | 207.9 -><br>181.0 | 5  | 264.9 -><br>210.0 | 10 |
| Fenvalerate-1        | 35.32 | 167.0 -><br>125.1 | 5  | 224.9 -><br>119.0 | 15 |
| Fenvalerate-2        | 35.76 | 167.0 -><br>125.1 | 5  | 224.9 -><br>119.0 | 15 |
| Flucythrinate-1      | 34.45 | 156.9 -><br>107.1 | 15 | 198.9 -><br>157.0 | 10 |
| Flucythrinate-2      | 34.80 | 156.9 -><br>107.1 | 15 | 198.9 -><br>157.0 | 10 |
| Isocarbophos         | 25.09 | 135.9 -><br>108.0 | 15 | 135.9 -><br>69.0  | 30 |

|                   |       |                   |    |                   |    |
|-------------------|-------|-------------------|----|-------------------|----|
| Isofenphos-methyl | 24.47 | 199.0 -><br>121.0 | 10 | 241.1 -><br>199.1 | 10 |
| Isoproc carb      | 15.07 | 121.0 -><br>77.1  | 20 | 136.0 -><br>121.1 | 10 |
| Kresoxim-methyl   | 26.94 | 116.0 -><br>89.0  | 15 | 116.0 -><br>63.0  | 30 |
| Malaoxon          | 22.60 | 126.9 -><br>99.0  | 5  | 126.9 -><br>55.0  | 5  |
| Mepanipirim       | 26.11 | 223.2 -><br>222.2 | 10 | 222.2 -><br>207.2 | 15 |
| Methacrifos       | 12.89 | 207.9 -><br>180.1 | 5  | 207.9 -><br>93.0  | 10 |
| Naled             | 16.83 | 108.9 -><br>79.0  | 5  | 144.9 -><br>109.0 | 15 |
| Parathion-methyl  | 22.82 | 262.9 -><br>109.0 | 10 | 232.9 -><br>109.0 | 10 |
| Procymidone       | 26.36 | 96.0 -> 67.1      | 10 | 96.0 -> 53.1      | 15 |
| Pyridaben         | 32.59 | 147.2 -><br>117.1 | 20 | 147.2 -><br>132.2 | 10 |
| Tecnazene         | 14.57 | 260.9 -><br>203.0 | 10 | 214.9 -><br>179.0 | 10 |
| Terbufos          | 18.55 | 230.9 -><br>175.0 | 10 | 230.9 -><br>129.0 | 20 |
| Terbufos sulfone  | 26.29 | 152.9 -><br>96.9  | 10 | 198.9 -><br>96.9  | 20 |
| Tetramethrin-1    | 30.51 | 164.0 -><br>107.1 | 10 | 164.0 -><br>77.1  | 25 |
| Tetramethrin-2    | 30.70 | 164.0 -><br>107.1 | 10 | 164.0 -><br>77.1  | 25 |
| Vinclozolin       | 22.18 | 187.0 -><br>124.0 | 20 | 197.9 -><br>145.0 | 15 |

**Table S5.** Retention times and MRM parameters of phthalates for GC-MS/MS.

| Phthalate                     | t <sub>R</sub> (min) | MRM1      | CE1<br>(ev) | MRM2          | CE2<br>(ev) |
|-------------------------------|----------------------|-----------|-------------|---------------|-------------|
| Benzyl butyl phthalate        | 14.56                | 149 -> 65 | 20          | 149 -> 93     | 15          |
| Bis(2-butoxyethyl) phthalate  | 15.88                | 149 -> 65 | 20          | 148.9 ->121.1 | 10          |
| Bis(2-ethoxyethyl) Phthalate  | 12.17                | 104 -> 76 | 10          | 149->65       | 20          |
| Bis(2-ethylhexyl) phthalate   | 16.71                | 167-> 149 | 10          | 148.9-> 120.9 | 10          |
| Bis(2-methoxyethyl) phthalate | 11.23                | 104->76.1 | 10          | 104 -> 49.8   | 25          |

|                                  |       |           |    |               |    |
|----------------------------------|-------|-----------|----|---------------|----|
| Bis(4-methyl-2-pentyl) phthalate | 11.90 | 167->149  | 10 | 148.9-> 120.9 | 10 |
| Dibenzyl phthalate               | 19.42 | 107->79.1 | 10 | 91.1-> 65.1   | 15 |
| Dibutyl phthalate                | 10.93 | 149-> 65  | 20 | 149-> 93      | 15 |
| Dicyclohexyl phthalate           | 16.51 | 167->121  | 20 | 249->149      | 10 |
| Diethyl phthalate                | 8.61  | 177->149  | 10 | 149-> 65      | 20 |
| Dihexyl phthalate                | 14.41 | 149-> 65  | 20 | 148.9->120.9  | 10 |
| Diisobutyl phthalate             | 10.27 | 149-> 65  | 20 | 149 -> 93     | 15 |
| Diisodecyl phthalate             | 23.73 | 149->65   | 30 | 307->149.1    | 10 |
| Diisononyl phthalate             | 22.09 | 149->65   | 25 | 293-> 149     | 10 |
| Dimethyl phthalate               | 7.74  | 163-> 77  | 20 | 163-> 133     | 10 |
| Dinoctyl phthalate               | 18.97 | 149 -> 65 | 20 | 149 -> 93     | 15 |
| Dinonyl phthalate                | 23.53 | 149->93   | 15 | 148.9->120.9  | 20 |
| Dipentyl phthalate               | 12.51 | 149-> 65  | 20 | 148.9-> 120.9 | 10 |

**Table S6.** The detection rates of Pb and Cd in conventional and hydroponic produced vegetable samples.

| Vegetable | Heavy metal | Detection rate in conventional samples (%) | Detection rate in hydroponic samples (%) |
|-----------|-------------|--------------------------------------------|------------------------------------------|
| lettuce   | Pb          | 80.8                                       | 46.9                                     |
|           | Cd          | 84.6                                       | 31.2                                     |
| celery    | Pb          | 100                                        | 100                                      |
|           | Cd          | 100                                        | 73.3                                     |
| tomato    | Pb          | 72.7                                       | 70.0                                     |
|           | Cd          | 77.3                                       | 50.0                                     |
| cucumber  | Pb          | 65.2                                       | 78.9                                     |
|           | Cd          | 65.2                                       | 57.9                                     |
